# Supplementary material for: Phase-Dependent Adsorption of Myelin Basic Protein to Phosphatidylcholine Lipid Bilayers
Source: MDPI journal article supplement (doi:10.3390/membranes14010015), 2024-01-04
Supplement: s1 [file s1]

## Supporting Information

|                                                                      |    |
|----------------------------------------------------------------------|----|
| <b>S1. DLS data and microscopic images of MBP, DPPC and MBP+DPPC</b> | p2 |
| <b>S2. DSC curves of MBP in NaCl<sub>(aq)</sub></b>                  | p3 |
| <b>S3. Initial configurations of MBP+DPPC</b>                        | p4 |
| <b>S4. Additional CD data</b>                                        | p5 |
| <b>S5. Additional molecular dynamics data</b>                        | p6 |

## S1. DLS data and microscopic images of MBP, DPPC and MBP+DPPC

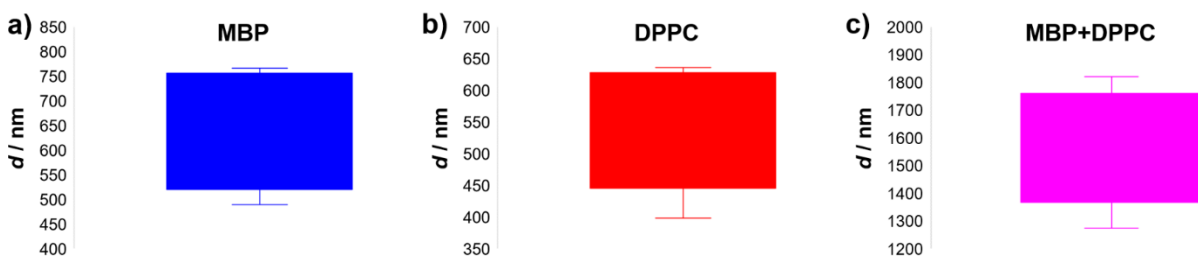

Figure S1. DLS data of: a) MBP; b) DPPC; c) MBP+DPPC in  $\text{NaCl}_{(\text{aq})}$  obtained at 25 °C.

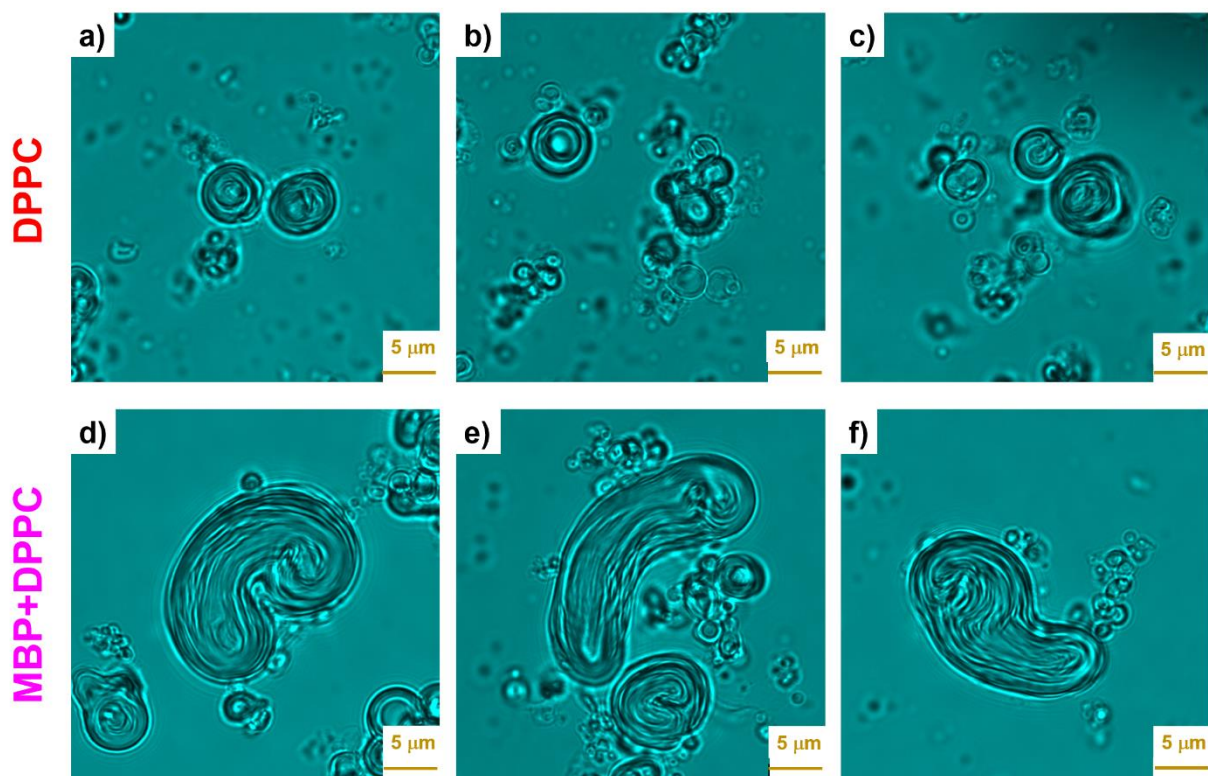

Figure S2. Confocal microscope images of: DPPC (upper row: a), b, c)) and MBP+DPPC (lower row: d), e), f)) in transmission.

## S2. DSC curves of MBP in NaCl<sub>(aq)</sub>

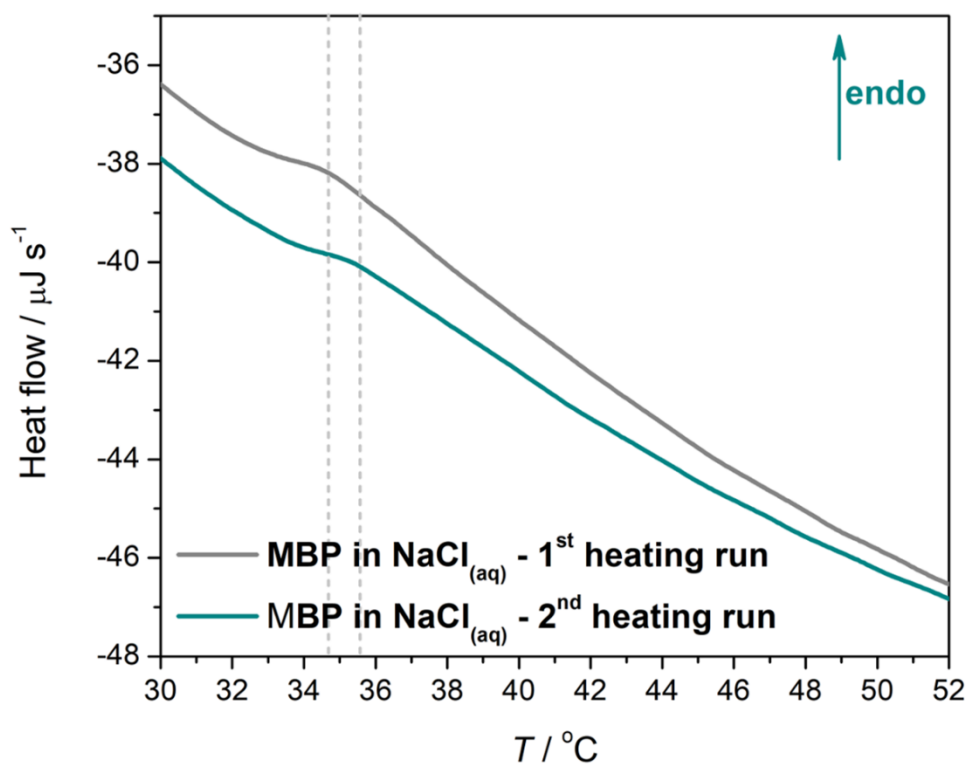

Figure S3. DSC curves (raw data) of MBP in NaCl<sub>(aq)</sub> obtained from the first (gray) and second (dark cyan) heating runs. Dashed lines designated estimated maximum of very weak thermotropic event.

### S3. Initial configurations of MBP+DPPC

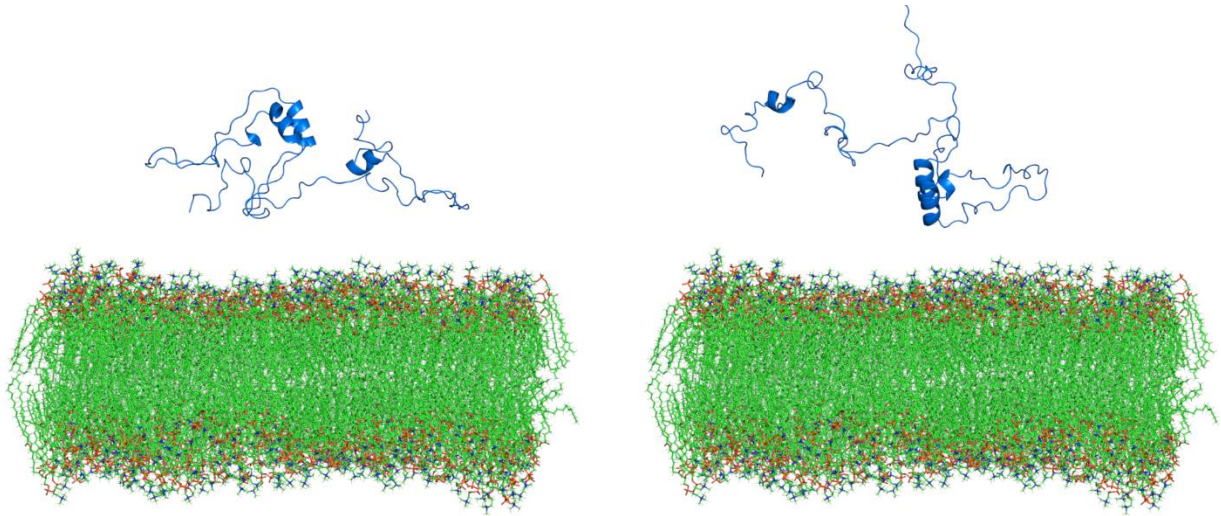

Fig S4. Equilibrated structures used as initial configurations for production simulations at 20 °C. MBP orientation 1 and orientation 2 (left and right, respectively).

#### S4. Additional CD data

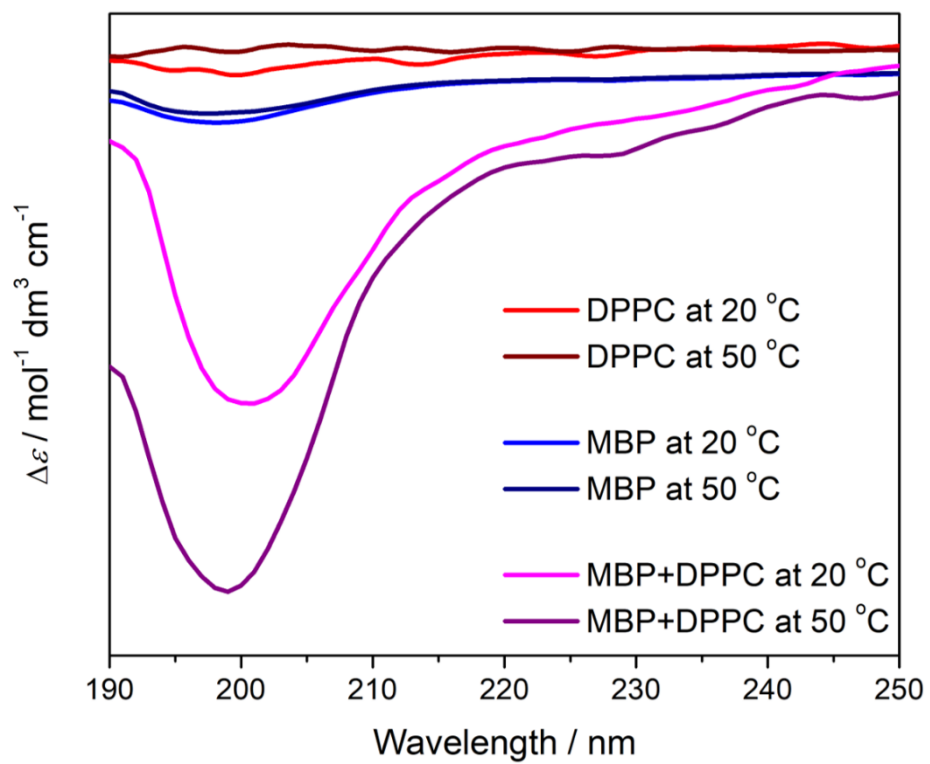

Fig S5. Mean smoothed CD spectra of MBP, DPPC and MBP+DPPC measured at 20 °C and 50 °C.

## S5. Additional molecular dynamics data

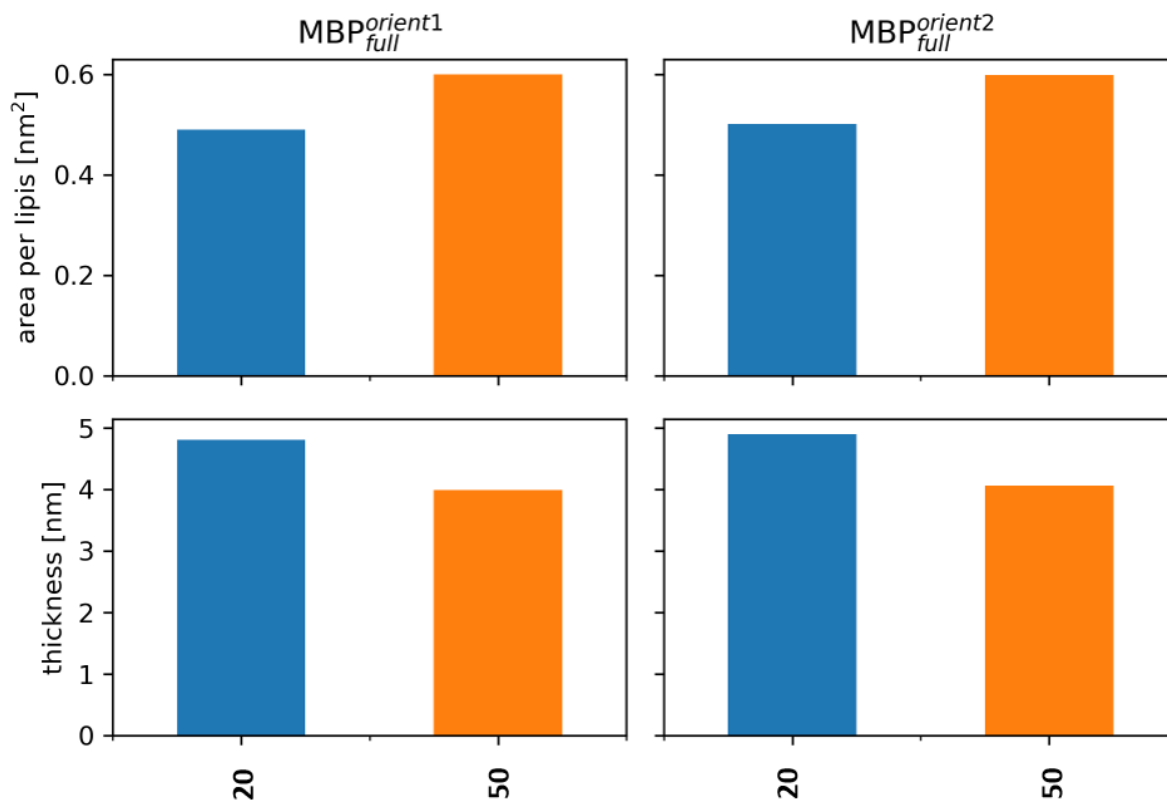

Fig S6. Membrane area per lipid (APL; nm<sup>2</sup>) and thickness (nm) at 20 °C and 50 °C. As expected, with increased temperature, the area per lipid increases and thickness decreases. The properties are consistent in simulation of MBP in different initial orientations.

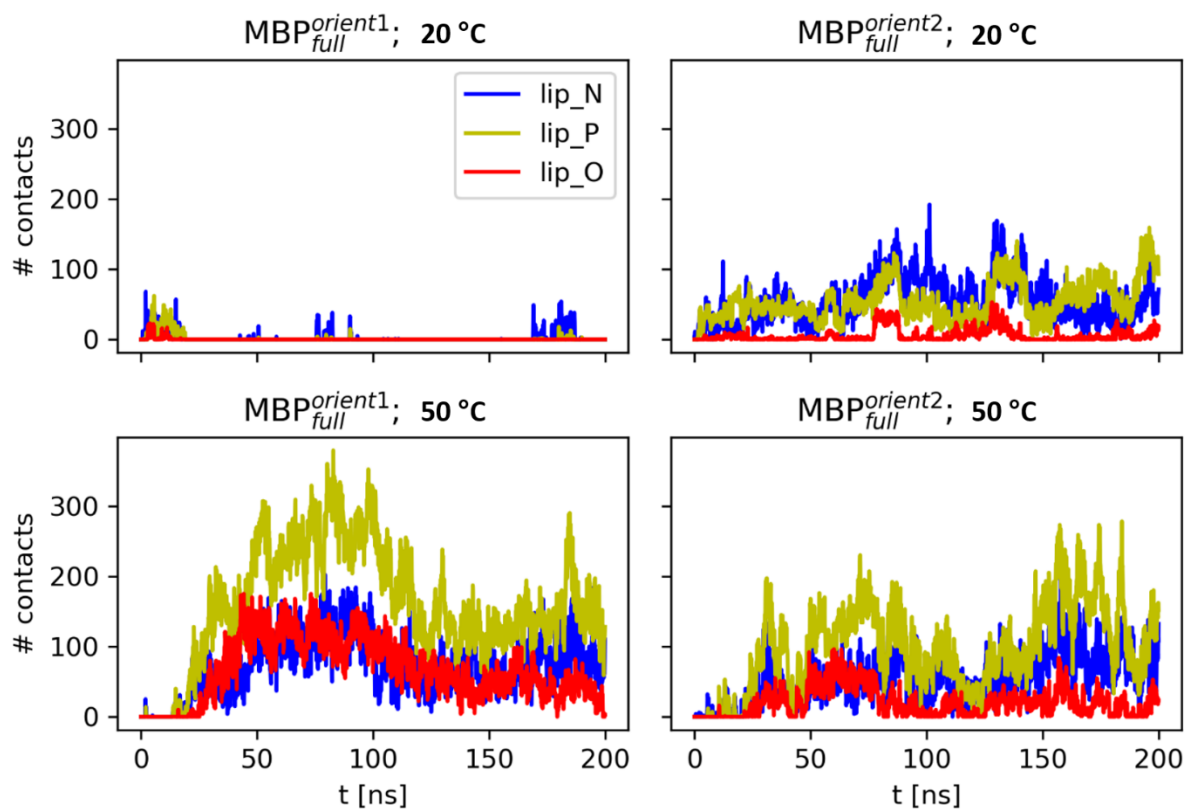

Fig S7. Type of interactions between MBP and DPPC. At higher temperature MBP forms contacts predominantly with the phosphate group of lipid heads (especially in the orientation 1). At the lower temperature, the choline and phosphate groups contribute approximately equally to the number of contacts between the protein and the membrane. Choline groups in blue, phosphate groups in yellow and oxygen atoms (glycerol backbone) in red. Top and bottom row represent data from 20 °C and 50 °C, while left and right columns represent orientation 1 and 2.

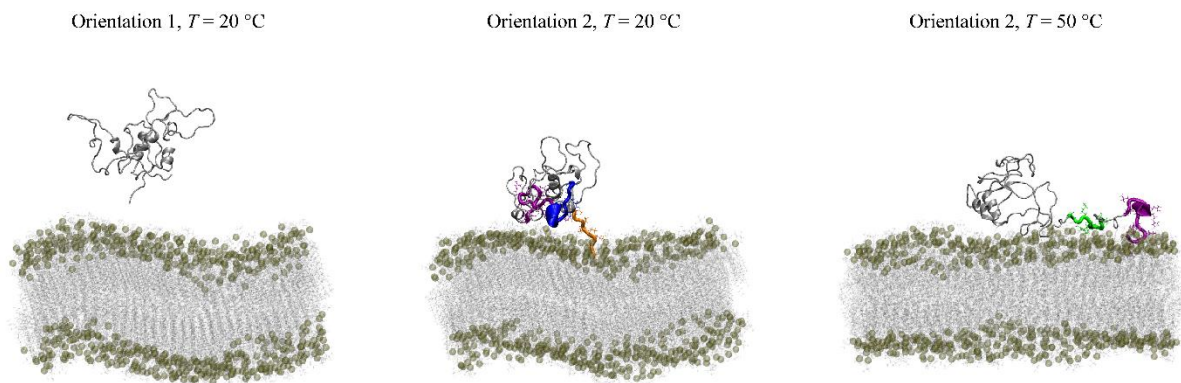

Fig S8. Structure of MBP in different scenarios. Left panel) at the endpoint of the orientation 1,  $T = 20\text{ }^{\circ}\text{C}$  simulation, with MBP not being in contact with the lipid bilayer. Middle panel) snapshot from orientation 2,  $T = 20\text{ }^{\circ}\text{C}$  case, possessing most contacts/interactions with DPPC during its respective simulation. Right panel) snapshot from orientation 2,  $T = 50\text{ }^{\circ}\text{C}$  case, possessing most contacts/interactions with DPPC during its respective simulation. Phosphorous atoms belonging to the lipid headgroups are shown in transparent yellow, with the remainder of the bilayer given in gray. Protein regions interacting with the DPPC bilayer are shown in orange (residues 1 to 8), blue (residues 45 to 55), green (residues 136 to 144) and purple (residues 153 to 169).



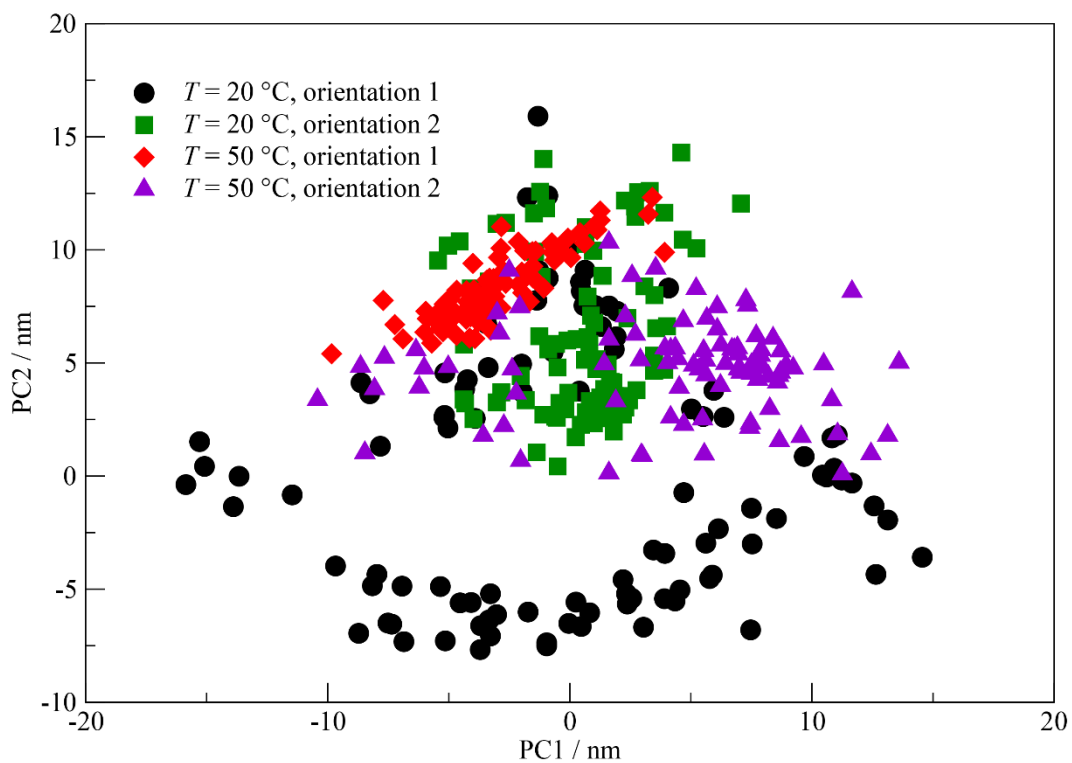

Fig S9. Principal component analysis was based on the  $\text{C}\alpha$  atoms of MBP backbone, with all structures projected onto the common (first two) principal components. In each case, structures representing the entire span of their respective simulations ( $t = 200\text{ ns}$ ) were considered.

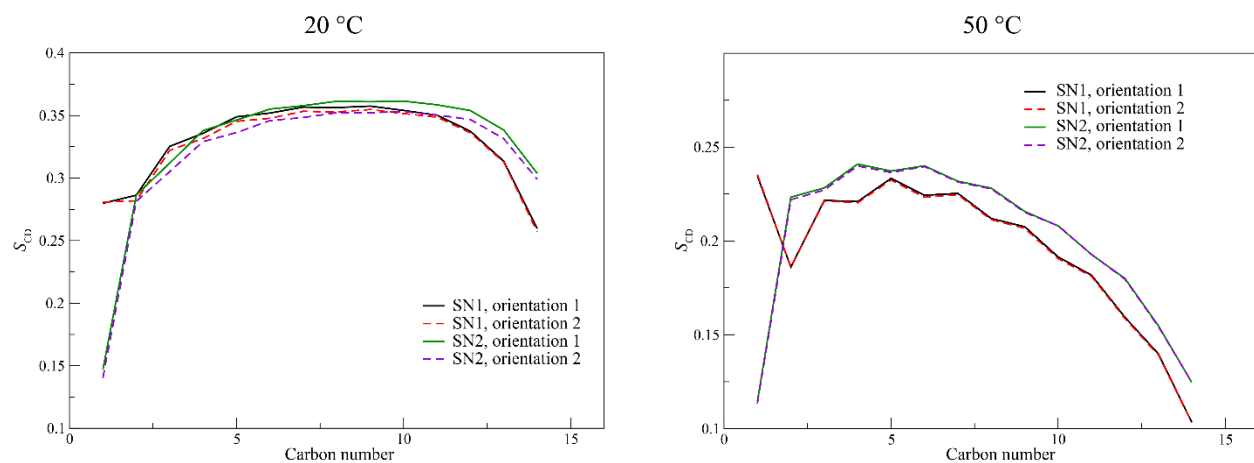

Fig S10. Deuterium order parameter calculated for both *sn1* and *sn2* acyl chains of both DPPC leaflets (last 150 ns considered in all cases). Obtained order parameters show statistically insignificant difference to the reference pure DPPC systems at  $T = 20\text{ }^{\circ}\text{C}$  and  $T = 50\text{ }^{\circ}\text{C}$  (consult ref. 74 from the manuscript, SI, Figure S4).

Table S1. Average number (#) of HBs and of contacts between MBP residues and the lipid bilayer in the last 150 ns of orientation 1 and orientation 2,  $T = 20$  °C scenarios, respectively.

| Residue | orientation 1    |                       | orientation 2    |                       |
|---------|------------------|-----------------------|------------------|-----------------------|
|         | Average # of HBs | Average # of contacts | Average # of HBs | Average # of contacts |
| 1ALA    | 0                | 0.00                  | 0.09             | 24.55                 |
| 2ALA    | 0                | 0.00                  | 0.07             | 10.75                 |
| 3GLN    | 0                | 0.00                  | 0.00             | 13.67                 |
| 4LYS    | 0                | 0.00                  | 0.09             | 21.17                 |
| 5ARG    | 0                | 0.00                  | 0.00             | 2.09                  |
| 6PRO    | 0                | 0.00                  | 0.00             | 0.04                  |
| 7SER    | 0                | 0.00                  | 0.00             | 0.17                  |
| 8GLN    | 0                | 0.00                  | 0.00             | 0.00                  |
| 9ARG    | 0                | 0.00                  | 0.01             | 3.20                  |
| 10SER   | 0                | 0.00                  | 0.00             | 0.00                  |
| 11LYS   | 0                | 0.00                  | 0.00             | 0.00                  |
| 12TYR   | 0                | 0.00                  | 0.00             | 0.00                  |
| 13LEU   | 0                | 0.00                  | 0.00             | 0.00                  |
| 14ALA   | 0                | 0.00                  | 0.00             | 0.00                  |
| 15SER   | 0                | 0.00                  | 0.00             | 0.00                  |
| 16ALA   | 0                | 0.00                  | 0.00             | 0.00                  |
| 17SER   | 0                | 0.00                  | 0.00             | 0.00                  |
| 18THR   | 0                | 0.00                  | 0.00             | 0.00                  |
| 19MET   | 0                | 0.00                  | 0.00             | 0.00                  |
| 20ASP   | 0                | 0.00                  | 0.00             | 0.00                  |
| 21HSD   | 0                | 0.00                  | 0.00             | 0.00                  |
| 22ALA   | 0                | 0.00                  | 0.00             | 0.00                  |
| 23ARG   | 0                | 0.00                  | 0.00             | 0.00                  |
| 24HSD   | 0                | 0.00                  | 0.00             | 0.00                  |
| 25GLY   | 0                | 0.00                  | 0.00             | 0.00                  |
| 26PHE   | 0                | 0.00                  | 0.00             | 0.00                  |
| 27LEU   | 0                | 0.00                  | 0.00             | 0.00                  |
| 28PRO   | 0                | 0.00                  | 0.00             | 0.00                  |
| 29ARG   | 0                | 0.00                  | 0.00             | 0.00                  |

| Residue | orientation 1    |                       | orientation 2    |                       |
|---------|------------------|-----------------------|------------------|-----------------------|
|         | Average # of HBs | Average # of contacts | Average # of HBs | Average # of contacts |
| 30HSD   | 0                | 0.00                  | 0.00             | 0.00                  |
| 31ARG   | 0                | 0.00                  | 0.00             | 0.00                  |
| 32ASP   | 0                | 0.00                  | 0.00             | 0.00                  |
| 33THR   | 0                | 0.00                  | 0.00             | 0.00                  |
| 34GLY   | 0                | 0.00                  | 0.00             | 0.00                  |
| 35ILE   | 0                | 0.00                  | 0.00             | 0.00                  |
| 36LEU   | 0                | 0.00                  | 0.00             | 0.99                  |
| 37ASP   | 0                | 0.00                  | 0.00             | 0.00                  |
| 38SER   | 0                | 0.00                  | 0.00             | 0.00                  |
| 39LEU   | 0                | 0.00                  | 0.00             | 0.01                  |
| 40GLY   | 0                | 0.00                  | 0.00             | 0.00                  |
| 41ARG   | 0                | 0.00                  | 0.00             | 0.00                  |
| 42PHE   | 0                | 0.00                  | 0.00             | 0.00                  |
| 43PHE   | 0                | 0.00                  | 0.00             | 2.76                  |
| 44GLY   | 0                | 0.00                  | 0.00             | 0.14                  |
| 45SER   | 0                | 0.00                  | 0.00             | 10.96                 |
| 46ASP   | 0                | 0.00                  | 0.00             | 19.62                 |
| 47ARG   | 0                | 0.00                  | 0.00             | 21.50                 |
| 48GLY   | 0                | 0.00                  | 0.00             | 30.42                 |
| 49ALA   | 0                | 0.00                  | 0.00             | 9.07                  |
| 50PRO   | 0                | 0.00                  | 0.00             | 29.03                 |
| 51LYS   | 0                | 0.00                  | 0.72             | 92.12                 |
| 52ARG   | 0                | 0.00                  | 0.00             | 2.21                  |
| 53GLY   | 0                | 0.00                  | 0.00             | 2.25                  |
| 54SER   | 0                | 0.00                  | 0.00             | 0.01                  |
| 55GLY   | 0                | 0.00                  | 0.00             | 0.00                  |
| 56LYS   | 0                | 0.00                  | 0.00             | 0.00                  |
| 57ASP   | 0                | 0.00                  | 0.00             | 0.00                  |
| 58GLY   | 0                | 0.00                  | 0.00             | 0.00                  |
| 59HSD   | 0                | 0.00                  | 0.00             | 8.49                  |
| 60HSD   | 0                | 0.00                  | 0.00             | 24.70                 |
| 61ALA   | 0                | 0.00                  | 0.00             | 10.84                 |

| Residue | orientation 1    |                       | orientation 2    |                       |
|---------|------------------|-----------------------|------------------|-----------------------|
|         | Average # of HBs | Average # of contacts | Average # of HBs | Average # of contacts |
| 62ALA   | 0                | 0.00                  | 0.00             | 9.93                  |
| 63ARG   | 0                | 0.00                  | 0.00             | 4.75                  |
| 64THR   | 0                | 0.00                  | 0.00             | 0.71                  |
| 65THR   | 0                | 0.05                  | 0.00             | 1.74                  |
| 66HSD   | 0                | 2.24                  | 0.00             | 2.36                  |
| 67TYR   | 0                | 6.20                  | 0.00             | 0.13                  |
| 68GLY   | 0                | 1.17                  | 0.00             | 0.00                  |
| 69SER   | 0                | 2.62                  | 0.00             | 0.00                  |
| 70LEU   | 0                | 0.18                  | 0.00             | 0.00                  |
| 71PRO   | 0                | 0.22                  | 0.00             | 0.00                  |
| 72GLN   | 0                | 0.00                  | 0.00             | 0.00                  |
| 73LYS   | 0                | 0.00                  | 0.00             | 0.00                  |
| 74ALA   | 0                | 0.00                  | 0.00             | 0.00                  |
| 75GLN   | 0                | 0.00                  | 0.00             | 0.00                  |
| 76GLY   | 0                | 0.00                  | 0.00             | 0.00                  |
| 77HSD   | 0                | 0.00                  | 0.00             | 0.00                  |
| 78ARG   | 0                | 0.00                  | 0.00             | 0.00                  |
| 79PRO   | 0                | 0.00                  | 0.00             | 0.00                  |
| 80GLN   | 0                | 0.00                  | 0.00             | 0.00                  |
| 81ASP   | 0                | 0.00                  | 0.00             | 0.00                  |
| 82GLU   | 0                | 0.00                  | 0.00             | 0.00                  |
| 83ASN   | 0                | 0.00                  | 0.00             | 0.00                  |
| 84PRO   | 0                | 0.00                  | 0.00             | 0.00                  |
| 85VAL   | 0                | 0.00                  | 0.00             | 0.00                  |
| 86VAL   | 0                | 0.00                  | 0.00             | 0.00                  |
| 87HSD   | 0                | 0.00                  | 0.00             | 0.00                  |
| 88PHE   | 0                | 0.00                  | 0.00             | 0.00                  |
| 89PHE   | 0                | 0.00                  | 0.00             | 0.00                  |
| 90LYS   | 0                | 0.00                  | 0.00             | 0.00                  |
| 91ASN   | 0                | 0.00                  | 0.00             | 0.00                  |
| 92ILE   | 0                | 0.00                  | 0.00             | 0.00                  |
| 93VAL   | 0                | 0.00                  | 0.00             | 0.00                  |

| Residue | orientation 1    |                       | orientation 2    |                       |
|---------|------------------|-----------------------|------------------|-----------------------|
|         | Average # of HBs | Average # of contacts | Average # of HBs | Average # of contacts |
| 94THR   | 0                | 0.00                  | 0.00             | 0.00                  |
| 95PRO   | 0                | 0.00                  | 0.00             | 0.00                  |
| 96ARG   | 0                | 0.00                  | 0.00             | 0.00                  |
| 97THR   | 0                | 0.00                  | 0.00             | 0.00                  |
| 98PRO   | 0                | 0.00                  | 0.00             | 0.00                  |
| 99PRO   | 0                | 0.00                  | 0.00             | 0.00                  |
| 100PRO  | 0                | 0.00                  | 0.00             | 0.00                  |
| 101SER  | 0                | 0.00                  | 0.00             | 0.00                  |
| 102GLN  | 0                | 0.00                  | 0.00             | 0.00                  |
| 103GLY  | 0                | 0.00                  | 0.00             | 0.00                  |
| 104LYS  | 0                | 0.00                  | 0.00             | 0.00                  |
| 105GLY  | 0                | 0.00                  | 0.00             | 0.00                  |
| 106ARG  | 0                | 0.00                  | 0.00             | 0.00                  |
| 107GLY  | 0                | 0.00                  | 0.00             | 0.00                  |
| 108LEU  | 0                | 0.00                  | 0.00             | 0.00                  |
| 109SER  | 0                | 0.00                  | 0.00             | 0.00                  |
| 110LEU  | 0                | 0.00                  | 0.00             | 0.00                  |
| 111SER  | 0                | 0.00                  | 0.00             | 0.00                  |
| 112ARG  | 0                | 0.00                  | 0.00             | 0.00                  |
| 113PHE  | 0                | 0.00                  | 0.00             | 0.00                  |
| 114SER  | 0                | 0.00                  | 0.00             | 0.00                  |
| 115TRP  | 0                | 0.00                  | 0.00             | 0.00                  |
| 116GLY  | 0                | 0.00                  | 0.00             | 0.00                  |
| 117ALA  | 0                | 0.00                  | 0.00             | 0.00                  |
| 118GLU  | 0                | 0.00                  | 0.00             | 0.00                  |
| 119GLY  | 0                | 0.00                  | 0.00             | 0.00                  |
| 120GLN  | 0                | 0.00                  | 0.00             | 1.16                  |
| 121LYS  | 0                | 0.00                  | 0.00             | 0.01                  |
| 122PRO  | 0                | 0.00                  | 0.00             | 2.37                  |
| 123GLY  | 0                | 0.00                  | 0.00             | 4.45                  |
| 124PHE  | 0                | 0.00                  | 0.00             | 7.95                  |
| 125GLY  | 0                | 0.00                  | 0.00             | 18.18                 |

| Residue | orientation 1    |                       | orientation 2    |                       |
|---------|------------------|-----------------------|------------------|-----------------------|
|         | Average # of HBs | Average # of contacts | Average # of HBs | Average # of contacts |
| 126TYR  | 0                | 0.00                  | 0.00             | 23.42                 |
| 127GLY  | 0                | 0.00                  | 0.00             | 29.86                 |
| 128GLY  | 0                | 0.00                  | 0.09             | 45.14                 |
| 129ARG  | 0                | 0.00                  | 1.04             | 177.07                |
| 130ALA  | 0                | 0.00                  | 0.00             | 6.37                  |
| 131SER  | 0                | 0.00                  | 0.07             | 14.86                 |
| 132ASP  | 0                | 0.00                  | 0.00             | 6.21                  |
| 133TYR  | 0                | 0.00                  | 0.00             | 0.08                  |
| 134LYS  | 0                | 0.00                  | 0.08             | 14.26                 |
| 135SER  | 0                | 0.00                  | 0.00             | 0.28                  |
| 136ALA  | 0                | 0.00                  | 0.00             | 0.00                  |
| 137HSD  | 0                | 0.00                  | 0.00             | 0.09                  |
| 138LYS  | 0                | 0.00                  | 0.00             | 0.00                  |
| 139GLY  | 0                | 0.00                  | 0.00             | 0.00                  |
| 140LEU  | 0                | 0.00                  | 0.00             | 0.00                  |
| 141LYS  | 0                | 0.00                  | 0.00             | 0.00                  |
| 142GLY  | 0                | 0.00                  | 0.00             | 0.00                  |
| 143HSD  | 0                | 0.00                  | 0.00             | 0.00                  |
| 144ASP  | 0                | 0.00                  | 0.00             | 0.00                  |
| 145ALA  | 0                | 0.00                  | 0.00             | 0.00                  |
| 146GLN  | 0                | 0.00                  | 0.00             | 0.00                  |
| 147GLY  | 0                | 0.00                  | 0.00             | 0.00                  |
| 148THR  | 0                | 0.00                  | 0.00             | 0.26                  |
| 149LEU  | 0                | 0.00                  | 0.00             | 0.62                  |
| 150SER  | 0                | 0.00                  | 0.00             | 0.00                  |
| 151LYS  | 0                | 0.00                  | 0.00             | 0.00                  |
| 152ILE  | 0                | 0.00                  | 0.00             | 14.26                 |
| 153PHE  | 0                | 0.00                  | 0.00             | 22.96                 |
| 154LYS  | 0                | 0.00                  | 0.04             | 10.64                 |
| 155LEU  | 0                | 0.00                  | 0.00             | 0.93                  |
| 156GLY  | 0                | 0.00                  | 0.00             | 0.05                  |
| 157GLY  | 0                | 0.00                  | 0.00             | 0.00                  |

| Residue | orientation 1    |                       | orientation 2    |                       |
|---------|------------------|-----------------------|------------------|-----------------------|
|         | Average # of HBs | Average # of contacts | Average # of HBs | Average # of contacts |
| 158ARG  | 0                | 0.00                  | 0.00             | 0.04                  |
| 159ASP  | 0                | 0.00                  | 0.00             | 0.00                  |
| 160SER  | 0                | 0.00                  | 0.00             | 0.00                  |
| 161ARG  | 0                | 0.00                  | 0.00             | 0.00                  |
| 162SER  | 0                | 0.00                  | 0.00             | 0.04                  |
| 163GLY  | 0                | 0.00                  | 0.00             | 0.00                  |
| 164SER  | 0                | 0.00                  | 0.00             | 0.47                  |
| 165PRO  | 0                | 0.00                  | 0.00             | 0.70                  |
| 166MET  | 0                | 0.00                  | 0.00             | 0.91                  |
| 167ALA  | 0                | 0.00                  | 0.00             | 0.12                  |
| 168ARG  | 0                | 0.00                  | 0.05             | 5.82                  |
| 169ARG  | 0                | 0.00                  | 0.07             | 15.61                 |



Table S2. Average number (#) of HBs and of contacts between MBP residues and the lipid bilayer in the last 150 ns of orientation 1 and orientation 2,  $T = 50$  °C scenarios, respectively.

| Residue | orientation 1    |                       | orientation 2    |                       |
|---------|------------------|-----------------------|------------------|-----------------------|
|         | Average # of HBs | Average # of contacts | Average # of HBs | Average # of contacts |
| 1ALA    | 0.03             | 5.71                  | 0.01             | 1.36                  |
| 2ALA    | 0.00             | 5.09                  | 0.00             | 0.00                  |
| 3GLN    | 0.00             | 5.33                  | 0.00             | 0.00                  |
| 4LYS    | 0.16             | 31.09                 | 0.00             | 0.00                  |
| 5ARG    | 0.37             | 30.88                 | 0.00             | 0.00                  |
| 6PRO    | 0.00             | 5.16                  | 0.00             | 0.00                  |
| 7SER    | 0.00             | 0.09                  | 0.00             | 0.00                  |
| 8GLN    | 0.00             | 7.28                  | 0.00             | 0.00                  |
| 9ARG    | 0.00             | 0.00                  | 0.00             | 0.00                  |
| 10SER   | 0.00             | 0.00                  | 0.00             | 0.00                  |
| 11LYS   | 0.00             | 0.14                  | 0.00             | 0.00                  |
| 12TYR   | 0.00             | 0.00                  | 0.00             | 0.00                  |
| 13LEU   | 0.00             | 0.00                  | 0.00             | 0.00                  |
| 14ALA   | 0.00             | 0.00                  | 0.00             | 0.00                  |
| 15SER   | 0.00             | 1.01                  | 0.00             | 0.00                  |
| 16ALA   | 0.00             | 1.20                  | 0.00             | 0.00                  |
| 17SER   | 0.00             | 0.58                  | 0.00             | 0.00                  |
| 18THR   | 0.00             | 6.70                  | 0.00             | 0.00                  |
| 19MET   | 0.00             | 3.32                  | 0.00             | 0.00                  |
| 20ASP   | 0.00             | 3.71                  | 0.00             | 0.00                  |
| 21HSD   | 0.00             | 2.83                  | 0.00             | 0.00                  |
| 22ALA   | 0.00             | 1.04                  | 0.00             | 0.00                  |
| 23ARG   | 0.05             | 6.18                  | 0.00             | 0.00                  |
| 24HSD   | 0.00             | 0.00                  | 0.00             | 0.00                  |
| 25GLY   | 0.00             | 0.00                  | 0.00             | 0.00                  |
| 26PHE   | 0.00             | 0.20                  | 0.00             | 0.00                  |
| 27LEU   | 0.00             | 0.00                  | 0.00             | 0.00                  |
| 28PRO   | 0.00             | 0.00                  | 0.00             | 0.00                  |

| Residue | orientation 1    |                       | orientation 2    |                       |
|---------|------------------|-----------------------|------------------|-----------------------|
|         | Average # of HBs | Average # of contacts | Average # of HBs | Average # of contacts |
| 29ARG   | 0.00             | 0.25                  | 0.00             | 0.00                  |
| 30HSD   | 0.00             | 0.00                  | 0.00             | 0.00                  |
| 31ARG   | 0.00             | 1.20                  | 0.00             | 0.00                  |
| 32ASP   | 0.00             | 0.07                  | 0.00             | 0.00                  |
| 33THR   | 0.00             | 0.00                  | 0.00             | 0.05                  |
| 34GLY   | 0.00             | 0.00                  | 0.00             | 0.00                  |
| 35ILE   | 0.00             | 0.00                  | 0.00             | 0.01                  |
| 36LEU   | 0.00             | 0.03                  | 0.00             | 0.00                  |
| 37ASP   | 0.00             | 0.46                  | 0.00             | 0.00                  |
| 38SER   | 0.00             | 0.00                  | 0.00             | 0.00                  |
| 39LEU   | 0.00             | 0.00                  | 0.00             | 0.00                  |
| 40GLY   | 0.00             | 0.29                  | 0.00             | 0.00                  |
| 41ARG   | 0.00             | 0.38                  | 0.00             | 0.00                  |
| 42PHE   | 0.00             | 0.04                  | 0.00             | 0.00                  |
| 43PHE   | 0.00             | 4.03                  | 0.00             | 0.00                  |
| 44GLY   | 0.00             | 10.34                 | 0.00             | 0.00                  |
| 45SER   | 0.00             | 24.11                 | 0.00             | 0.00                  |
| 46ASP   | 0.00             | 12.37                 | 0.00             | 0.00                  |
| 47ARG   | 0.75             | 125.76                | 0.00             | 0.00                  |
| 48GLY   | 0.01             | 7.59                  | 0.00             | 0.00                  |
| 49ALA   | 0.00             | 3.36                  | 0.00             | 0.00                  |
| 50PRO   | 0.00             | 4.22                  | 0.00             | 0.00                  |
| 51LYS   | 0.09             | 24.38                 | 0.00             | 0.00                  |
| 52ARG   | 0.20             | 27.09                 | 0.00             | 0.00                  |
| 53GLY   | 0.00             | 2.95                  | 0.00             | 0.00                  |
| 54SER   | 0.01             | 4.92                  | 0.00             | 0.00                  |
| 55GLY   | 0.00             | 0.62                  | 0.00             | 0.01                  |
| 56LYS   | 0.00             | 0.83                  | 0.01             | 1.14                  |
| 57ASP   | 0.00             | 2.08                  | 0.00             | 0.00                  |
| 58GLY   | 0.00             | 0.05                  | 0.00             | 0.00                  |
| 59HSD   | 0.00             | 0.79                  | 0.00             | 0.00                  |

| Residue | orientation 1    |                       | orientation 2    |                       |
|---------|------------------|-----------------------|------------------|-----------------------|
|         | Average # of HBs | Average # of contacts | Average # of HBs | Average # of contacts |
| 60HSD   | 0.00             | 0.24                  | 0.00             | 0.00                  |
| 61ALA   | 0.00             | 0.00                  | 0.00             | 0.00                  |
| 62ALA   | 0.00             | 0.00                  | 0.00             | 0.00                  |
| 63ARG   | 0.00             | 0.00                  | 0.00             | 0.00                  |
| 64THR   | 0.00             | 0.00                  | 0.00             | 0.00                  |
| 65THR   | 0.00             | 0.00                  | 0.00             | 0.00                  |
| 66HSD   | 0.00             | 0.00                  | 0.00             | 0.00                  |
| 67TYR   | 0.00             | 0.00                  | 0.00             | 0.00                  |
| 68GLY   | 0.00             | 0.00                  | 0.00             | 0.00                  |
| 69SER   | 0.00             | 0.00                  | 0.00             | 0.00                  |
| 70LEU   | 0.00             | 0.00                  | 0.00             | 0.00                  |
| 71PRO   | 0.00             | 0.00                  | 0.00             | 0.00                  |
| 72GLN   | 0.00             | 0.00                  | 0.00             | 0.00                  |
| 73LYS   | 0.00             | 0.00                  | 0.00             | 0.00                  |
| 74ALA   | 0.00             | 0.00                  | 0.00             | 0.00                  |
| 75GLN   | 0.00             | 0.00                  | 0.00             | 0.01                  |
| 76GLY   | 0.00             | 0.00                  | 0.00             | 0.00                  |
| 77HSD   | 0.00             | 0.00                  | 0.00             | 1.64                  |
| 78ARG   | 0.07             | 4.93                  | 0.01             | 3.30                  |
| 79PRO   | 0.00             | 0.01                  | 0.00             | 0.00                  |
| 80GLN   | 0.01             | 3.74                  | 0.00             | 0.11                  |
| 81ASP   | 0.00             | 2.42                  | 0.00             | 0.00                  |
| 82GLU   | 0.00             | 0.00                  | 0.00             | 0.00                  |
| 83ASN   | 0.00             | 0.28                  | 0.00             | 0.00                  |
| 84PRO   | 0.00             | 0.22                  | 0.00             | 0.00                  |
| 85VAL   | 0.00             | 0.00                  | 0.00             | 0.00                  |
| 86VAL   | 0.00             | 0.00                  | 0.00             | 0.00                  |
| 87HSD   | 0.00             | 0.00                  | 0.00             | 0.00                  |
| 88PHE   | 0.00             | 0.00                  | 0.00             | 0.00                  |
| 89PHE   | 0.00             | 0.00                  | 0.00             | 0.01                  |
| 90LYS   | 0.00             | 0.00                  | 0.00             | 0.04                  |

| Residue | orientation 1       |                          | orientation 2       |                          |
|---------|---------------------|--------------------------|---------------------|--------------------------|
|         | Average # of<br>HBs | Average # of<br>contacts | Average # of<br>HBs | Average # of<br>contacts |
| 91ASN   | 0.00                | 0.00                     | 0.00                | 0.00                     |
| 92ILE   | 0.00                | 0.00                     | 0.00                | 0.00                     |
| 93VAL   | 0.00                | 0.00                     | 0.00                | 0.78                     |
| 94THR   | 0.00                | 0.00                     | 0.00                | 0.18                     |
| 95PRO   | 0.00                | 0.00                     | 0.00                | 2.70                     |
| 96ARG   | 0.00                | 0.00                     | 0.00                | 0.34                     |
| 97THR   | 0.00                | 0.00                     | 0.00                | 0.08                     |
| 98PRO   | 0.00                | 0.00                     | 0.00                | 2.16                     |
| 99PRO   | 0.00                | 0.00                     | 0.00                | 0.41                     |
| 100PRO  | 0.00                | 0.00                     | 0.00                | 0.00                     |
| 101SER  | 0.00                | 0.00                     | 0.00                | 3.32                     |
| 102GLN  | 0.00                | 0.00                     | 0.00                | 9.11                     |
| 103GLY  | 0.00                | 0.00                     | 0.00                | 7.47                     |
| 104LYS  | 0.00                | 0.00                     | 0.43                | 50.33                    |
| 105GLY  | 0.00                | 0.00                     | 0.00                | 3.29                     |
| 106ARG  | 0.00                | 0.00                     | 0.00                | 1.61                     |
| 107GLY  | 0.00                | 0.00                     | 0.00                | 2.76                     |
| 108LEU  | 0.00                | 0.00                     | 0.00                | 37.17                    |
| 109SER  | 0.00                | 0.00                     | 0.22                | 25.63                    |
| 110LEU  | 0.00                | 0.00                     | 0.00                | 4.30                     |
| 111SER  | 0.00                | 0.00                     | 0.00                | 3.80                     |
| 112ARG  | 0.00                | 0.00                     | 0.67                | 62.37                    |
| 113PHE  | 0.00                | 0.00                     | 0.00                | 16.43                    |
| 114SER  | 0.00                | 0.00                     | 0.00                | 0.18                     |
| 115TRP  | 0.00                | 0.00                     | 0.00                | 5.49                     |
| 116GLY  | 0.00                | 0.00                     | 0.00                | 0.47                     |
| 117ALA  | 0.00                | 0.00                     | 0.00                | 0.04                     |
| 118GLU  | 0.00                | 0.00                     | 0.00                | 0.00                     |
| 119GLY  | 0.00                | 0.00                     | 0.00                | 0.00                     |
| 120GLN  | 0.00                | 0.00                     | 0.00                | 0.00                     |
| 121LYS  | 0.00                | 0.00                     | 0.00                | 0.00                     |

| Residue | orientation 1    |                       | orientation 2    |                       |
|---------|------------------|-----------------------|------------------|-----------------------|
|         | Average # of HBs | Average # of contacts | Average # of HBs | Average # of contacts |
| 122PRO  | 0.00             | 0.00                  | 0.00             | 0.00                  |
| 123GLY  | 0.00             | 0.00                  | 0.00             | 0.01                  |
| 124PHE  | 0.00             | 0.00                  | 0.00             | 1.29                  |
| 125GLY  | 0.00             | 0.00                  | 0.00             | 4.74                  |
| 126TYR  | 0.00             | 0.00                  | 0.01             | 23.16                 |
| 127GLY  | 0.00             | 0.00                  | 0.00             | 27.11                 |
| 128GLY  | 0.00             | 0.00                  | 0.13             | 44.36                 |
| 129ARG  | 0.00             | 0.00                  | 1.91             | 202.82                |
| 130ALA  | 0.00             | 0.00                  | 0.01             | 11.05                 |
| 131SER  | 0.00             | 0.00                  | 0.11             | 42.26                 |
| 132ASP  | 0.00             | 0.00                  | 0.00             | 14.22                 |
| 133TYR  | 0.00             | 0.00                  | 0.05             | 28.92                 |
| 134LYS  | 0.00             | 0.05                  | 0.38             | 53.95                 |
| 135SER  | 0.00             | 0.00                  | 0.08             | 21.25                 |
| 136ALA  | 0.00             | 0.87                  | 0.01             | 11.64                 |
| 137HSD  | 0.01             | 8.80                  | 0.00             | 10.07                 |
| 138LYS  | 0.07             | 22.95                 | 0.16             | 26.82                 |
| 139GLY  | 0.00             | 4.30                  | 0.00             | 2.83                  |
| 140LEU  | 0.00             | 10.26                 | 0.00             | 13.92                 |
| 141LYS  | 0.34             | 59.21                 | 0.07             | 16.21                 |
| 142GLY  | 0.00             | 29.05                 | 0.00             | 0.78                  |
| 143HSD  | 0.08             | 51.80                 | 0.00             | 3.62                  |
| 144ASP  | 0.00             | 6.01                  | 0.00             | 0.62                  |
| 145ALA  | 0.00             | 4.78                  | 0.00             | 1.50                  |
| 146GLN  | 0.00             | 4.71                  | 0.00             | 2.29                  |
| 147GLY  | 0.00             | 0.00                  | 0.00             | 0.47                  |
| 148THR  | 0.00             | 0.00                  | 0.00             | 2.62                  |
| 149LEU  | 0.00             | 0.00                  | 0.00             | 1.67                  |
| 150SER  | 0.00             | 0.01                  | 0.00             | 0.74                  |
| 151LYS  | 0.00             | 1.01                  | 0.00             | 0.80                  |
| 152ILE  | 0.00             | 0.00                  | 0.00             | 1.07                  |

| Residue | orientation 1       |                          | orientation 2       |                          |
|---------|---------------------|--------------------------|---------------------|--------------------------|
|         | Average # of<br>HBs | Average # of<br>contacts | Average # of<br>HBs | Average # of<br>contacts |
| 153PHE  | 0.00                | 0.00                     | 0.00                | 3.61                     |
| 154LYS  | 0.00                | 5.54                     | 0.03                | 8.20                     |
| 155LEU  | 0.00                | 2.50                     | 0.00                | 3.78                     |
| 156GLY  | 0.00                | 6.50                     | 0.01                | 1.54                     |
| 157GLY  | 0.03                | 3.67                     | 0.00                | 0.84                     |
| 158ARG  | 2.66                | 247.45                   | 0.09                | 12.43                    |
| 159ASP  | 0.51                | 143.76                   | 0.00                | 5.89                     |
| 160SER  | 0.82                | 211.05                   | 0.00                | 3.16                     |
| 161ARG  | 2.20                | 329.33                   | 0.30                | 27.74                    |
| 162SER  | 0.97                | 93.25                    | 0.00                | 11.32                    |
| 163GLY  | 0.11                | 6.86                     | 0.05                | 10.66                    |
| 164SER  | 0.00                | 0.03                     | 0.07                | 20.93                    |
| 165PRO  | 0.00                | 3.66                     | 0.00                | 19.09                    |
| 166MET  | 0.00                | 0.68                     | 0.00                | 21.95                    |
| 167ALA  | 0.00                | 0.16                     | 0.11                | 33.50                    |
| 168ARG  | 0.53                | 81.68                    | 0.91                | 122.91                   |
| 169ARG  | 0.78                | 127.90                   | 1.07                | 113.36                   |
